# Supplementary material
Source: Springer Nature journal article supplement (http://www.springermedizin.de/resource/supplementary/12887_2011_526_MOESM7_ESM.pdf/9475094)

## PGI-R: Average Change vs. Age

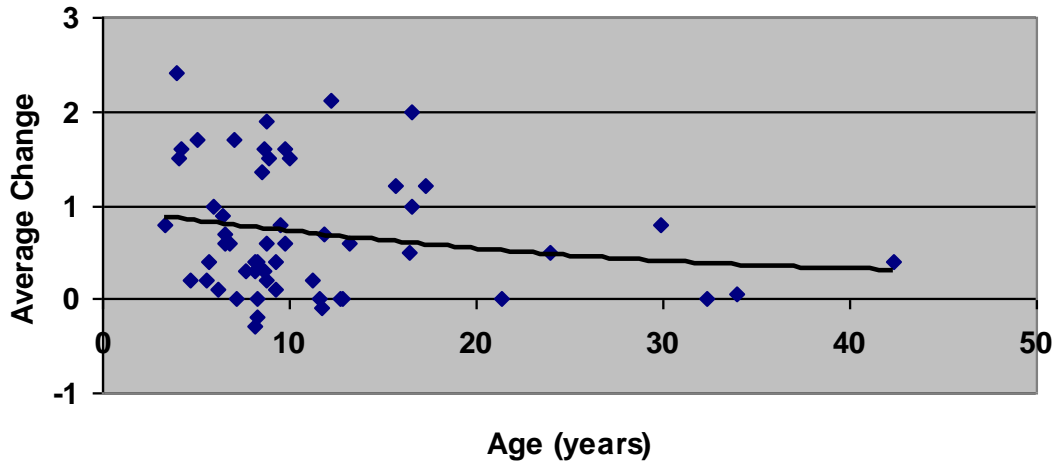

Supplement: MOESM7 [file 9475094]
